# Supplementary material for: Prevalence of Behavioral Flags in the Electronic Health Record Among Black and White Patients Visiting the Emergency Department
Source: PubMed Central journal article supplement (PMC9857105; doi:10.1001/jamanetworkopen.2022.51734), 2023-01-19
Supplement: jamanetwopen-e2251734-s001.pdf [file jamanetwopen-e2251734-s001.pdf]

## Supplemental Online Content

Agarwal AK, Seeburger E, O'Neill G, et al. Prevalence of behavioral flags in the electronic health record among Black and White patients visiting the emergency department. *JAMA Netw Open.* 2023;6(1):e2251734. doi:10.1001/jamanetworkopen.2022.51734

**eTable 1.** Patient- and Visit-Level Characteristics Comparing All Patients With and Without Behavioral Flags Excluding Sickle Cell Related Chief Concerns and Frequent Utilizing Patients

**eTable 2.** Patient- and Visit-Level Characteristics Comparing Black and White Patients with Behavioral Flags Excluding Sickle Cell Related Chief Complaints and Frequent Utilizing Patients

**eTable 3.** Patient- and Visit-Level Characteristics Comparing All Patients and High Utilizing Patients and Sickle Cell Related Concerns

This supplemental material has been provided by the authors to give readers additional information about their work.

**eTable 1.** Patient- and Visit-Level Characteristics Comparing All Patients With and Without Behavioral Flags Excluding Sickle Cell Related Chief Concerns and Frequent Utilizing Patients

|                                      | Flag                                          | No flag             |                |
|--------------------------------------|-----------------------------------------------|---------------------|----------------|
|                                      | All Patients, N (%)                           | All Patients, N (%) | P Value        |
| Total Patients                       | 522 (0.3%)                                    | 194,192 (99.7)      |                |
| Total Visits                         | 1184 (0.3%)                                   | 382,658 (99.7)      |                |
| Age                                  |                                               |                     | P=.000         |
|                                      | <i>18-24</i>                                  | 54 (10.3)           | 55,829 (14.6)  |
|                                      | <i>25-34</i>                                  | 132 (25.3)          | 81,953 (21.4)  |
|                                      | <i>35-44</i>                                  | 133 (25.5)          | 53,872 (14.2)  |
|                                      | <i>45-54</i>                                  | 100 (19.2)          | 53,230 (13.9)  |
|                                      | <i>55-64</i>                                  | 78 (14.9)           | 59,886 (15.7)  |
|                                      | <i>65 and older</i>                           | 25 (4.8)            | 77,888 (20.4)  |
| Gender                               |                                               |                     | P=.000         |
|                                      | <i>Male</i>                                   | 289 (55.4)          | 157,900 (41.3) |
|                                      | <i>Female</i>                                 | 233 (44.6)          | 224,756 (58.7) |
| Race                                 |                                               |                     | P=.000         |
|                                      | <i>Black (Includes Hispanic/Latinx)</i>       | 355 (68.0)          | 250,091 (65.4) |
|                                      | <i>White (includes Hispanic/Latinx)</i>       | 167 (32.0)          | 132,567 (34.6) |
| Insurance status                     |                                               |                     | P=.000         |
|                                      | <i>Commercial</i>                             | 69 (5.8)            | 40,846 (10.7)  |
|                                      | <i>Managed care</i>                           | 60 (5.1)            | 88,539 (23.1)  |
|                                      | <i>Medicaid</i>                               | 750 (63.3)          | 132,206 (34.6) |
|                                      | <i>Medicare</i>                               | 240 (20.3)          | 98,452 (25.7)  |
|                                      | <i>Self-pay</i>                               | 65 (5.5)            | 22,607 (5.9)   |
| Emergency Severity Index (ESI) Level |                                               |                     |                |
|                                      | <i>ESI Level 1 (most acute)</i>               | 7 (.6)              | 2,532 (.7)     |
|                                      | <i>ESI Level 2</i>                            | 288 (25.0)          | 86,544 (23.2)  |
|                                      | <i>ESI Level 3</i>                            | 595 (51.7)          | 193,311 (51.9) |
|                                      | <i>ESI Level 4</i>                            | 188 (16.4)          | 78,767 (21.1)  |
|                                      | <i>ESI Level 5 (least acute)</i>              | 53 (4.6)            | 9,511 (2.6)    |
|                                      | <i>Psych</i>                                  | 19 (1.7)            | 2,029 (.5)     |
| Emergency Department                 |                                               |                     |                |
|                                      | <i>Hospital #1 (Tertiary Referral Center)</i> | 412 (34.8)          | 157,520 (41.1) |
|                                      | <i>Hospital #2</i>                            | 454 (38.3)          | 99,400 (26.0)  |
|                                      | <i>Hospital #3 (Level 1 Trauma Center)</i>    | 318 (26.9)          | 125,738 (32.9) |
| Insurance status                     |                                               |                     |                |
|                                      | <i>Commercial</i>                             | 69 (5.8)            | 40,846 (10.7)  |
|                                      | <i>Managed care</i>                           | 60 (5.1)            | 88,539 (23.1)  |
|                                      | <i>Medicaid</i>                               | 750 (63.3)          | 132,206 (34.6) |

|                                                                                                                                                         |                            |                            |                |
|---------------------------------------------------------------------------------------------------------------------------------------------------------|----------------------------|----------------------------|----------------|
| <i>Medicare</i>                                                                                                                                         | 240 (20.3)                 | 98,452 (25.7)              |                |
| <i>Self-pay</i>                                                                                                                                         | 65 (5.5)                   | 22,607 (5.9)               |                |
|                                                                                                                                                         | <b>Flag</b>                | <b>No flag</b>             |                |
|                                                                                                                                                         | <b>Median (IQR)</b>        | <b>Median (IQR)</b>        | <b>P Value</b> |
| WR time (minutes)                                                                                                                                       | 20.27 (7.95-77.53)         | 29.63 (10.43-91.97)        | P=.000         |
| Wait to see clinician (minutes)                                                                                                                         | 33.79 (15.87-82.75)        | 40.07 (18.72-95.60)        | P=.000         |
| In-room time (minutes)                                                                                                                                  | 222.95 (110.35-386.2)      | 224.75 (125.08-374.06)     | p=.5965        |
| ED LOS (minutes)                                                                                                                                        | 277.28 (149-461)           | 291 (173-466)              | p=.0123        |
|                                                                                                                                                         | <b>All Patients, N (%)</b> | <b>All Patients, N (%)</b> | <b>P Value</b> |
| Number of lab orders                                                                                                                                    |                            |                            |                |
| <i>0 lab orders</i>                                                                                                                                     | 415 (35.05)                | 104,287 (27.25)            | P=.000         |
| <i>1-3 lab orders</i>                                                                                                                                   | 133 (11.23)                | 46,539 (12.16)             |                |
| <i>4 or more lab orders</i>                                                                                                                             | 636 (53.72)                | 231,832 (60.58)            |                |
| Number of medication orders                                                                                                                             |                            |                            | P=.000         |
| <i>0 medication orders</i>                                                                                                                              | 292 (24.66)                | 66,012 (17.55)             | P=.000         |
| <i>1-3 medication orders</i>                                                                                                                            | 411 (34.71)                | 141,317 (36.93)            |                |
| <i>4 or more medication orders</i>                                                                                                                      | 481 (40.62)                | 175,329 (45.82)            |                |
| Number of imaging orders                                                                                                                                |                            |                            | P=.000         |
| <i>None</i>                                                                                                                                             | 616 (52.03)                | 152,086 (39.74)            | P=.000         |
| <i>X-ray only</i>                                                                                                                                       | 266 (22.47)                | 100,369 (26.23)            |                |
| <i>Advanced imaging (CT, US, or MRI)</i>                                                                                                                | 302 (25.51)                | 130,203 (34.03)            |                |
| Disposition                                                                                                                                             |                            |                            | P=.000         |
| <i>Admit</i>                                                                                                                                            | 177 (14.96)                | 69847 (18.16)              | P=.000         |
| <i>Discharge</i>                                                                                                                                        | 750 (63.4)                 | 264911 (68.89)             |                |
| <i>Left against medical advice or without being seen</i>                                                                                                | 200 (16.91)                | 26492 (6.89)               |                |
| <i>Observation</i>                                                                                                                                      | 23 (1.94)                  | 16756 (4.36)               |                |
| <i>Transfer</i>                                                                                                                                         | 20 (1.69)                  | 2951 (.77)                 |                |
| <i>Triaged</i>                                                                                                                                          | 4 (.34)                    | 957 (.25)                  |                |
| <i>Voided/Other</i>                                                                                                                                     | 10 (.84)                   | 2623 (.68)                 |                |
| Urine Drug Screen (UDS) present                                                                                                                         | 114 (21.84)                | 12,849 (6.60)              | P=.000         |
| Presence of intramuscular medication**                                                                                                                  | 62 (11.87)                 | 15,744 (8.09)              | p=.001         |
| Restraints used                                                                                                                                         | 1 (.19)                    | 46 (.02)                   | p=.024         |
| *Non-flag visits for patients who eventually received a behavioral flag during the study period were excluded **excludes tetanus vaccine administration |                            |                            |                |

**eTable 2.** Patient- and Visit-Level Characteristics Comparing Black and White Patients with Behavioral Flags Excluding Sickle Cell Related Chief Complaints and Frequent Utilizing Patients

|                                                          | <b>Black Patients, N (%)</b>          | <b>White Patients, N (%)</b>          | <b>P Value</b> |
|----------------------------------------------------------|---------------------------------------|---------------------------------------|----------------|
| # and percent with flag                                  | 355<br>(3.1 flags per 1,000 patients) | 167<br>(2.0 flags per 1,000 patients) | p<.001         |
|                                                          | <b>Black Pts with Flag</b>            | <b>White Pts with Flag</b>            |                |
|                                                          | <b>Median (IQR)</b>                   | <b>Median (IQR)</b>                   | <b>P Value</b> |
| Waiting room time, minutes                               | 20.7 (7.8-74.3)                       | 15.9 (7.4-56.1)                       | p=.048         |
| Wait to see clinician, minutes                           | 33.7 (15.4-78.6)                      | 29.4 (13.9-72.6)                      | p=.198         |
| In-room time, minutes                                    | 224.9 (113.6-401.2)                   | 255.6 (130.7-401.0)                   | p=.152         |
| Length of stay, minutes                                  | 276.9 (144-476)                       | 293.9 (160-439)                       | p=.883         |
|                                                          | <b>N (%)</b>                          | <b>N (%)</b>                          | <b>P Value</b> |
| Number of lab orders                                     |                                       |                                       | p=.11          |
| <i>0 lab orders</i>                                      | 308 (36.9)                            | 107 (30.6)                            |                |
| <i>1-3 lab orders</i>                                    | 90 (10.8)                             | 43 (12.3)                             |                |
| <i>4 or more lab orders</i>                              | 436 (52.3)                            | 200 (57.1)                            |                |
| Number of medication orders                              |                                       |                                       | p=.14          |
| <i>0 medication orders</i>                               | 219 (26.3)                            | 73 (20.9)                             |                |
| <i>1-3 medication orders</i>                             | 283 (33.9)                            | 128 (36.6)                            |                |
| <i>4 or more medication orders</i>                       | 332 (39.8)                            | 149 (42.6)                            |                |
| Number of imaging orders                                 |                                       |                                       | p=.18          |
| <i>None</i>                                              | 442 (53.0)                            | 174 (49.7)                            |                |
| <i>X-ray only</i>                                        | 192 (23.0)                            | 74 (21.1)                             |                |
| <i>Advanced imaging (CT, US, or MRI)</i>                 | 200 (24.0)                            | 102 (29.1)                            |                |
| Disposition                                              |                                       |                                       | p=.005         |
| <i>Admit</i>                                             | 104 (12.5)                            | 73 (20.8)                             |                |
| <i>Discharge</i>                                         | 536 (64.4)                            | 214 (61.1)                            |                |
| <i>Left against medical advice or without being seen</i> | 154 (18.5)                            | 46 (13.1)                             |                |
| <i>Observation</i>                                       | 15 (1.8)                              | 8 (2.3)                               |                |
| <i>Transfer</i>                                          | 14 (1.7)                              | 6 (1.7)                               |                |
| <i>Triaged</i>                                           | 3 (.4)                                | 1 (.3)                                |                |
| <i>Voided/Other</i>                                      | 8 (1.0)                               | 2 (.6)                                |                |
| Emergency Department                                     |                                       |                                       | P=.000         |
| <i>Hospital of the University of Pennsylvania</i>        | 306 (36.7)                            | 106 (30.3)                            |                |
| <i>Pennsylvania Hospital</i>                             | 268 (32.1)                            | 186 (53.1)                            |                |
| <i>Penn Presbyterian Medical Center</i>                  | 260 (31.2)                            | 58 (16.6)                             |                |
| Insurance status                                         |                                       |                                       | p=.001         |
| <i>Commercial</i>                                        | 43 (5.2)                              | 26 (7.4)                              |                |
| <i>Managed care</i>                                      | 29 (3.5)                              | 31 (8.9)                              |                |

|                                      |            |            |       |
|--------------------------------------|------------|------------|-------|
| <i>Medicaid</i>                      | 548 (65.7) | 202 (57.7) | p=.07 |
| <i>Medicare</i>                      | 166 (19.9) | 74 (21.1)  |       |
| <i>Self-pay</i>                      | 48 (5.8)   | 17 (4.9)   |       |
| Emergency Severity Index (ESI) Level |            |            |       |
| <i>ESI Level 1 (most acute)</i>      | 3 (.4)     | 4 (1.1)    |       |
| <i>ESI Level 2</i>                   | 202 (24.2) | 86 (24.6)  |       |
| <i>ESI Level 3</i>                   | 407 (48.8) | 188 (53.7) |       |
| <i>ESI Level 4</i>                   | 142 (17.0) | 46 (13.1)  |       |
| <i>ESI Level 5 (least acute)</i>     | 44 (5.3)   | 9 (2.6)    |       |
| <i>Psych</i>                         | 11 (1.3)   | 8 (2.3)    |       |
| <i>Unknown</i>                       | 25 (3.0)   | 9 (2.6)    |       |

**eTable 3.** Patient- and Visit-Level Characteristics Comparing All Patients and High Utilizing Patients and Sickle Cell Related Concerns

| <b>Patient Characteristics Comparing All Comers and High Utilizers</b>                         |                            |                                                   |                             |                |
|------------------------------------------------------------------------------------------------|----------------------------|---------------------------------------------------|-----------------------------|----------------|
|                                                                                                | All Comers                 | All Comers (Excluding Many Visitors)              | Many Visitors (>18 visits)  |                |
|                                                                                                | <b>All Patients, N (%)</b> | <b>All Patients, N (%)</b>                        | <b>All Patients, N (%)</b>  | <b>P Value</b> |
| Total Patients                                                                                 | 195,601                    | 194,719                                           | 881                         |                |
| Total Visits                                                                                   | 420,007                    | 385,773                                           | 34,234                      |                |
| Age                                                                                            |                            |                                                   |                             |                |
| 18-24                                                                                          | 31,497 (16.1)              | 31,431 (16.14)                                    | 66 (7.49)                   | p<.01          |
| 25-34                                                                                          | 43,577 (22.28)             | 43,382 (22.28)                                    | 195 (22.13)                 |                |
| 35-44                                                                                          | 28,397 (14.52)             | 28,231 (14.5)                                     | 166 (18.84)                 |                |
| 45-54                                                                                          | 26,714 (13.66)             | 26,540 (13.63)                                    | 174 (19.75)                 |                |
| 55-64                                                                                          | 28,818 (14.73)             | 28,663 (14.72)                                    | 155 (17.59)                 |                |
| 65 and older                                                                                   | 36,598 (18.71)             | 36,473 (18.73)                                    | 125 (14.19)                 |                |
| Gender                                                                                         |                            |                                                   |                             |                |
| Female                                                                                         | 110,890 (56.69)            | 110,436 (56.72)                                   | 454 (51.53)                 | p<.01          |
| Male                                                                                           | 84,710 (43.31)             | 84,283 (43.28)                                    | 427 (48.47)                 |                |
| Race                                                                                           |                            |                                                   |                             |                |
| Black (Includes Hispanic/Latinx)                                                               | 113,638 (58.1)             | 112,908 (57.98)                                   | 730 (82.86)                 | p<.01          |
| White (includes Hispanic/Latinx)                                                               | 81,963 (41.9)              | 81,812 (42.02)                                    | 151 (17.14)                 |                |
| <b>Patient Characteristics Comparing All Comers and Chief Complaint Related to Sickle Cell</b> |                            |                                                   |                             |                |
|                                                                                                | All Comers                 | All Comers, Excluding Sickle Cell Chief Complaint | Sickle Cell Chief Complaint |                |
|                                                                                                | <b>All Patients, N (%)</b> | <b>All Patients, N (%)</b>                        | <b>All Patients, N (%)</b>  | <b>P Value</b> |
| Total Patients                                                                                 | 195,601                    | 195,101                                           | 500                         |                |
| Total Visits                                                                                   | 420,007                    | 412,784                                           | 7,223                       |                |
| Age                                                                                            |                            |                                                   |                             |                |
| 18-24                                                                                          | 31,497 (16.1)              | 31,358 (16.1)                                     | 139 (27.8)                  | p<.01          |
| 25-34                                                                                          | 43,577 (22.28)             | 43,361 (22.22)                                    | 216 (43.20)                 |                |
| 35-44                                                                                          | 28,397 (14.52)             | 28,312 (14.51)                                    | 85 (17)                     |                |
| 45-54                                                                                          | 26,714 (13.66)             | 26,677 (13.67)                                    | 37 (7.4)                    |                |
| 55-64                                                                                          | 28,818 (14.73)             | 28,800 (14.76)                                    | 18 (3.6)                    |                |
| 65 and older                                                                                   | 36,598 (18.71)             | 36,593 (18.76)                                    | 5 (1)                       |                |
| Gender                                                                                         |                            |                                                   |                             |                |
| Female                                                                                         | 110,890 (56.69)            | 110,607 (56.7)                                    | 283 (56.6)                  | p=.63          |
| Male                                                                                           | 84,710 (43.31)             | 84,493 (43.3)                                     | 217 (43.4)                  |                |
| Race                                                                                           |                            |                                                   |                             |                |
| Black (Includes Hispanic/Latinx)                                                               | 113,638 (58.1)             | 113,145 (58)                                      | 493 (98.6)                  | p<.01          |
| White (includes Hispanic/Latinx)                                                               | 81,963 (41.9)              | 81,956 (42)                                       | 7 (1.4)                     |                |

| Visit-Level Characteristics Comparing All Comers and High Utilizers |                                    |                                           |                                    |                |
|---------------------------------------------------------------------|------------------------------------|-------------------------------------------|------------------------------------|----------------|
|                                                                     | All Comers (N, %)                  | All Comers Excluding Many Visitors (N, %) | Many Visitors (N, %)               | P Value        |
| # and percent with flag                                             | 683 (3.5 flags per 1,000 patients) | 526 (2.7 flags per 1,000 patients)        | 157 (178 flags per 1,000 patients) | p<.01          |
|                                                                     | <b>Median (IQR)</b>                | <b>Median (IQR)</b>                       | <b>Median (IQR)</b>                | <b>P Value</b> |
| Waiting room time, minutes                                          | 29.23 (10.3-91.77)                 | 29.55 (10.42-91.92)                       | 25.63 (9.47-89.53)                 | p<.01          |
| Wait to see clinician, minutes                                      | 40.03 (18.67-96)                   | 40.05 (18.7-95.6)                         | 40 (18.25-101.4)                   | p=.09          |
| In-room time, minutes                                               | 226.2 (125.28-376.49)              | 225.37 (125.42-374.98)                    | 235.43 (123.25-394.08)             | p<.01          |
| Length of stay, minutes                                             | 292 (172-467)                      | 292 (173-466.01)                          | 292 (160.22-477)                   | p<.01          |
|                                                                     | <b>N (%)</b>                       | <b>N (%)</b>                              | <b>N (%)</b>                       | <b>P Value</b> |
| Number of lab orders                                                |                                    |                                           |                                    |                |
| 0 lab orders                                                        | 117,051 (27.87)                    | 105,302 (27.30)                           | 11,749 (34.32)                     | p<.01          |
| 1-3 lab orders                                                      | 50,774 (12.09)                     | 46,930 (12.17)                            | 3,844 (11.23)                      |                |
| 4 or more lab orders                                                | 252,182 (60.04)                    | 233,541 (60.54)                           | 18,641 (54.45)                     |                |
| Number of medication orders                                         |                                    |                                           |                                    |                |
| 0 medication orders                                                 | 74,393 (17.71)                     | 66,767 (17.31)                            | 7,626 (22.28)                      | p<.01          |
| 1-3 medication orders                                               | 153,400 (36.52)                    | 142,370 (36.91)                           | 11,030 (32.22)                     |                |
| 4 or more medication orders                                         | 192,214 (45.76)                    | 176,636 (45.79)                           | 15,578 (45.5)                      |                |
| Number of imaging orders                                            |                                    |                                           |                                    |                |
| None                                                                | 172,939 (41.18)                    | 153,675 (39.85)                           | 19,264 (56.27)                     | p<.01          |
| X-ray only                                                          | 110,308 (26.27)                    | 101,554 (26.33)                           | 8,754 (25.57)                      |                |
| Advanced imaging (CT, US, or MRI)                                   | 136,662 (32.55)                    | 130,448 (33.82)                           | 6,214 (18.15)                      |                |
| Disposition                                                         |                                    |                                           |                                    |                |
| Admit                                                               | 76,054 (18.11)                     | 70,037 (18.15)                            | 6,017 (17.58)                      | p<.01          |
| Discharge                                                           | 288,439 (68.67)                    | 265,694 (68.87)                           | 22,745 (66.44)                     |                |
| Left against medical advice or without being seen                   | 30,287 (7.21)                      | 26,697 (6.92)                             | 3,590 (10.49)                      |                |
| Observation                                                         | 18,052 (4.3)                       | 16,780 (4.35)                             | 1,272 (3.72)                       |                |
| Transfer                                                            | 3,157 (.75)                        | 2,971 (.77)                               | 186 (.54)                          |                |
| Triage                                                              | 1,029 (.24)                        | 961 (.25)                                 | 68 (.20)                           |                |
| Voided/Other                                                        | 2,989 (.71)                        | 2,633 (.68)                               | 356 (1.04)                         |                |
| Emergency Department                                                |                                    |                                           |                                    |                |
| Hopsital of the University of Pennsylvania                          | 171,447 (40.82)                    | 158,554 (41.1)                            | 12,893 (37.66)                     | p<.01          |
| Pennsylvania Hospital                                               | 112,009 (26.67)                    | 100,529 (26.06)                           | 11,480 (33.53)                     |                |
| Penn Presbyterian Medical Center                                    | 136,551 (32.51)                    | 126,690 (32.84)                           | 9,861 (28.8)                       |                |
| Insurance status                                                    |                                    |                                           |                                    |                |
| Commercial                                                          | 42,505 (10.12)                     | 41,039 (10.64)                            | 1,462 (4.27)                       | p<.01          |
| Managed care                                                        | 90,477 (21.54)                     | 88,730 (23)                               | 1,747 (5.1)                        |                |
| Medicaid                                                            | 154,918 (36.89)                    | 134,112 (34.77)                           | 20,806 (60.78)                     |                |
| Medicare                                                            | 108,912 (25.93)                    | 99,125 (25.7)                             | 9,787 (28.59)                      |                |
| Self-pay                                                            | 23,190 (5.52)                      | 22,759 (5.9)                              | 431 (1.26)                         |                |
| Emergency Severity Index (ESI) Level                                |                                    |                                           |                                    |                |
| ESI Level 1 (most acute)                                            | 2,626 (.64)                        | 2,545 (.68)                               | 81 (.24)                           | p<.01          |
| ESI Level 2                                                         | 94,185 (23.03)                     | 87,300 (23.24)                            | 6,885 (20.66)                      |                |
| ESI Level 3                                                         | 212,692 (52)                       | 194,884 (51.87)                           | 17,808 (53.43)                     |                |
| ESI Level 4                                                         | 84,437 (20.64)                     | 79,236 (21.09)                            | 5,201 (15.6)                       |                |
| ESI Level 5 (least acute)                                           | 12,653 (3.09)                      | 9,650 (2.57)                              | 3,003 (9.01)                       |                |
| Psych                                                               | 2,445 (.6)                         | 2,092 (.56)                               | 353 (1.06)                         |                |

| Visit-Level Characteristics Comparing All Comers versus Chief Complaint of Sickle Cell |                                    |                                         |                                       |                |
|----------------------------------------------------------------------------------------|------------------------------------|-----------------------------------------|---------------------------------------|----------------|
|                                                                                        | All Comers, N (%)                  | All Comers Excluding Sickle Cell, N (%) | Chief Complaint of Sickle Cell, N (%) | P Value        |
| # and percent with flag                                                                | 683 (3.5 flags per 1,000 patients) | 638 (3.3 flags per 1,000 patients)      | 45 (90 flags per 1,000 patients)      | p<.01          |
|                                                                                        | <b>Median (IQR)</b>                | <b>Median (IQR)</b>                     | <b>Median (IQR)</b>                   | <b>P Value</b> |
| Waiting room time, minutes                                                             | 29.23 (10.33-91.77)                | 29.38 (10.35-92.08)                     | 21.97 (9.75-76.32)                    | p<.01          |
| Wait to see clinician, minutes                                                         | 40.03 (18.67-96)                   | 40.1 (18.7-96.12)                       | 36.88 (17.18-89.18)                   | p<.01          |
| In-room time, minutes                                                                  | 226.2 (125.28-376.49)              | 224.75 (123.95-375.68)                  | 283.67 (200.07-408.35)                | p<.01          |
| Length of stay, minutes                                                                | 292 (172-467)                      | 291 (171-467)                           | 330 (228.67-490)                      | p<.01          |
|                                                                                        | <b>N (%)</b>                       | <b>N (%)</b>                            | <b>N (%)</b>                          | <b>P Value</b> |
| Number of lab orders                                                                   |                                    |                                         |                                       |                |
| 0 lab orders                                                                           | 117,051 (27.87)                    | 116,276 (28.17)                         | 775 (10.73)                           | p<.01          |
| 1-3 lab orders                                                                         | 50,774 (12.09)                     | 50,339 (12.19)                          | 435 (6.02)                            |                |
| 4 or more lab orders                                                                   | 252,182 (60.04)                    | 246,169 (59.64)                         | 6,013 (83.25)                         |                |
| Number of medication orders                                                            |                                    |                                         |                                       |                |
| 0 medication orders                                                                    | 74,393 (17.71)                     | 74,171 (17.97)                          | 222 (3.07)                            | p<.01          |
| 1-3 medication orders                                                                  | 153,400 (36.52)                    | 152,614 (36.97)                         | 786 (10.88)                           |                |
| 4 or more medication orders                                                            | 192,214 (45.76)                    | 185,999 (45.06)                         | 6,215 (86.04)                         |                |
| Number of imaging orders                                                               |                                    |                                         |                                       |                |
| None                                                                                   | 172,939 (41.18)                    | 169,327 (41.03)                         | 3,612 (50.01)                         | p<.01          |
| X-ray only                                                                             | 110,308 (26.27)                    | 107,351 (26.01)                         | 2,957 (40.94)                         |                |
| Advanced imaging (CT, US, or MRI)                                                      | 136,662 (32.55)                    | 136,008 (32.96)                         | 654 (9.05)                            |                |
| Disposition                                                                            |                                    |                                         |                                       |                |
| Admit                                                                                  | 76,054 (18.11)                     | 72,786 (17.63)                          | 3,268 (45.24)                         | p<.01          |
| Discharge                                                                              | 288,439 (68.67)                    | 284,842 (69.01)                         | 3,597 (49.8)                          |                |
| Left against medical advice or without being seen                                      | 30,287 (7.21)                      | 29,996 (7.27)                           | 291 (4.03)                            |                |
| Observation                                                                            | 18,052 (4.3)                       | 18,016 (4.36)                           | 36 (.5)                               |                |
| Transfer                                                                               | 3,157 (.75)                        | 3,141 (.76)                             | 16 (.22)                              |                |
| Triage                                                                                 | 1,029 (.24)                        | 1,023 (.25)                             | 6 (.08)                               |                |
| Voided/Other                                                                           | 2,989 (.71)                        | 2,980 (.72)                             | 9 (.12)                               |                |
| Emergency Department                                                                   |                                    |                                         |                                       |                |
| Hopsital of the University of Pennsylvania                                             | 171,447 (40.82)                    | 169,743 (41.12)                         | 1,704 (23.59)                         | p<.01          |
| Pennsylvania Hospital                                                                  | 112,009 (26.67)                    | 107,628 (26.07)                         | 4,381 (60.65)                         |                |
| Penn Presbyterian Medical Center                                                       | 136,551 (32.51)                    | 135,413 (32.8)                          | 1,138 (15.76)                         |                |
| Insurance status                                                                       |                                    |                                         |                                       |                |
| Commercial                                                                             | 42,505 (10.12)                     | 42,160 (10.21)                          | 342 (4.73)                            | p<.01          |
| Managed care                                                                           | 90,477 (21.54)                     | 89,538 (21.69)                          | 939 (13)                              |                |
| Medicaid                                                                               | 154,918 (36.89)                    | 150,526 (36.47)                         | 4,392 (60.81)                         |                |
| Medicare                                                                               | 108,912 (25.93)                    | 107,442 (26.03)                         | 1,470 (20.35)                         |                |
| Self-pay                                                                               | 23,190 (5.52)                      | 23,110 (5.6)                            | 80 (1.11)                             |                |
| Emergency Severity Index (ESI) Level                                                   |                                    |                                         |                                       |                |
| ESI Level 1 (most acute)                                                               | 2,626 (.64)                        | 2,626 (.65)                             | 0 (0)                                 | p<.01          |
| ESI Level 2                                                                            | 94,185 (23.03)                     | 92,871 (23.11)                          | 1,314 (18.2)                          |                |
| ESI Level 3                                                                            | 212,692 (52)                       | 206,797 (51.47)                         | 5,895 (81.65)                         |                |
| ESI Level 4                                                                            | 84,437 (20.64)                     | 84,427 (21.01)                          | 10 (.14)                              |                |
| ESI Level 5 (least acute)                                                              | 12,653 (3.09)                      | 12,652 (3.15)                           | 1 (.01)                               |                |
| Psych                                                                                  | 2,445 (.6)                         | 2,445 (.61)                             | 0 (0)                                 |                |
