# Supplementary material for: Prevalence of Behavioral Flags in the Electronic Health Record Among Black and White Patients Visiting the Emergency Department
Source: PubMed Central journal article supplement (PMC9857105; doi:10.1001/jamanetworkopen.2022.51734), 2023-01-19
Supplement: jamanetwopen-e2251734-s002.pdf [file jamanetwopen-e2251734-s002.pdf]

## Data Sharing Statement

Agarwal. Prevalence of Behavioral Flags in the Electronic Health Record Among Black and White Patients Visiting the Emergency Department. *JAMA Netw Open*. Published January 19, 2023. doi:10.1001/jamanetworkopen.2022.51734

### Data

**Data available:** Yes

**Data types:** Deidentified participant data

**How to access data:** data will be sent with approval, available from corresponding author [anish.agarwal@pennmedicine.upenn.edu](mailto:anish.agarwal@pennmedicine.upenn.edu)

**When available:** With publication

### Supporting Documents

**Document types:** None

### Additional Information

**Who can access the data:** researchers whose proposed use of the data has been approved

**Types of analyses:** for any purpose

**Mechanisms of data availability:** after approval of a proposal
